# Supplementary material
Source: PubMed Central journal article supplement (PMC4573892)
Supplement: NIHMS711039-supplement-7.pdf [file NIHMS711039-supplement-7.pdf]

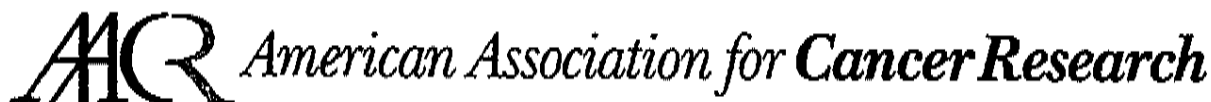

**AUTHORSHIP CHANGE FORM**

For all authorship changes, the AACR journals require written correspondence signed by all authors (including the author(s) being added or removed from the paper), explicitly stating the new author list and the reason for the change. Please note that if you are adding an author, the new author must also return a completed copyright transfer form.

Below is a letter you may use as a template. The completed letter should be returned via e-mail to [pubs@aacr.org](mailto:pubs@aacr.org) or via fax to (215) 440-9354.

-----

DATE \_\_\_\_\_

JOURNAL NAME Cancer Research

MANUSCRIPT NUMBER CAN-15-0234-R

MANUSCRIPT TITLE Maspin Expression in Prostate Tumor Cells Averts Ste

AUTHOR(S) ADDED/REMOVED Added: Dr. Jessica Back, Eric Van Buren/Re

*(If adding an author(s), the new author(s) must sign; if removing an author(s), the removed author(s) must sign.)*

Dear Editor:

We, the undersigned authors agree to the authorship change to our manuscript, as listed above.

Sincerely,

|                                                                                                      |                                        |
|------------------------------------------------------------------------------------------------------|----------------------------------------|
| Author signature _____                                                                               | Author name <u>Eric Van Buren</u>      |
| Author signature _____                                                                               | Author name <u>Dr. Xiang Han</u>       |
| Author signature _____                                                                               | Author name <u>Dr. Ivory Dean</u>      |
| Author signature _____                                                                               | Author name <u>Dr. Yong Q. Chen</u>    |
| Author signature 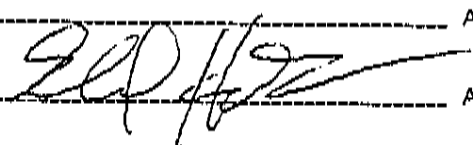 | Author name <u>Dr. Elisabeth Heath</u> |
| Author signature _____                                                                               | Author name <u>Dr. Wael Saker</u>      |
| Author signature _____                                                                               | Author name <u>Dr. Shijie Sheng</u>    |
| Author signature _____                                                                               | Author name _____                      |
| Author signature _____                                                                               | Author name _____                      |
